# Supplementary material for: Community-Based Mycetoma Surveillance in Uganda: Identifying Knowledge Gaps and Training of Community Health Workers to Improve Case Detection
Source: PLoS Negl Trop Dis. 2024 Oct 7;18(10):e0012572. doi: 10.1371/journal.pntd.0012572 (PMC11486432; doi:10.1371/journal.pntd.0012572)
Supplement: S1 Data — (XLSX) [file pntd.0012572.s001.xlsx]

## Sheet: Sheet1
MYCETOMA
DEMOGRAPHICS								KNOWLEDGE ON MYCETOMA															Details of one patient						MYCETOMA IDENTIFICATION
N0	Status	Initials	Sex	Age	District of practice	Highest level of Education	Number of years of Practice	Heard about mycetoma	Prior training on Mycetoma	Causative organisms of mycetoma	Score x/2	How mycetoma is acquired?	Score x/1	How mycetoma presents	Score x/3	Complications of mycetoma	Score x/2	Part of body affected most by mycetoma	Score x/1	Mimics of mycetoma	Score x/5	Have you encountered a patient with mycetoma in the last 6 months?	Sex	Age	Part of body affected	Action taken	Is mycetoma curable?	Score x/1	What pictures represent suspected mycetoma infected body part?	score x/3	Total score (x/18)
1	PRE	Participant 1	Female	27	Pader	Certificate	4	No	_	Fungi	1	Contact with an infected person	0	Pain	0	Death	0	Foot	1	I don’t know	0	No	_	_	_	_	yes	1	H	0	3
2	PRE	Participant 2	Male	26	Pader	Certificate	7	No	_	Fungi	1	I don’t know	0	Painless swelling	1	Loss of function of affected part	1	Foot	1	Cancer	1	No	_	_	Foot	Referred him to health facility	Yes	1	G	1	7
3	PRE	Participant 3	Female	40	Pader	Secondary	13	No	_	I don’t know	0	I don’t know	0	I don’t know	0	I don’t know	0	I don’t know	0	I don’t know	0	No	_	_	_	_	No	0	A	1	1
4	PRE	Participant 4	Female	43	Pader	Certificate	3	No	_	Bacteria	1	I don’t know	0	I don’t know	0	I don’t know	0	I don’t know	0	I don’t know	0	No	_	_	_	_	Yes	1	G	1	3
5	PRE	Participant 5	Female	35	Pader	Secondary	16	No	_	I don’t know	0	I don’t know	0	I don’t know	0	I don’t know	0	Foot	1	Foreign body granuloma	1	No	_	_	_	_	Yes	1	G	1	4
6	PRE	Partcipant 6	Female	56	Pader	Secondary	17	No	_	I don’t know	0	I don’t know	0	I don’t know	0	I don’t know	0	I don’t know	0	I don’t know	0	No	_	_	_	_	Yes	1	A	1	2
7	PRE	Partcipant 7	Male	40	Pader	Secondary	22	No	_	Bacteria, Fungi	2	Trauma to skin	1	Painless swelling, Pain	1	Loss of function of affected part	1	Foot	1	Foreign body granuloma, Pyomyositis, Chronic osteomyelitis	3	No					Yes	1	A, G	2	12
8	PRE	Partcipant 8	Male	30	Pader	Certificate	7	No		Fungi	1	Trauma to skin	1	Painless swelling	1	Deformity of affected part, Loss of function of affected part	2	Foot, Leg and Knee, Trunk, hand	0	Foreign body granuloma	1	No					I don’t know	0	A,B,C,G,H,L	3	9
9	PRE	Partcipant 9	Male	43	Pader	Secondary	22	No		Fungi	1	Trauma to skin, Contact with an infected person	0	Painless swelling, Discharge with grains, Pain	2	Loss of function of affected part, Death	1	Foot, Leg and Knee, Head and neck	0	Foreign body granuloma, Cancer	2	No					Yes	1	A, G	2	9
10	PRE	Partcipant 10	Male	49	Pader	Secondary	22	No		Fungi	1	Trauma to skin	1	Painless swelling, Discharge with grains, Pain	2	Deformity of affected part	1	Foot, Leg and knee, Head and neck	0	Foreign body granuloma	1	Yes	Male	9	Foot	Referred him to health facility	Yes	1	G, K,L	1	8
11	PRE	Partcipant 11	Male	44	Pader	Secondary	18	Yes	No	Bacteria	1	Trauma to skin, Contact with an infected person	0	Painless swelling, multiple sinuses	2	Deformity of affected part, Loss of function of affected part	2	Foot, hand, leg and knee	0	Foreign body granuloma, Cancer	2	No					Yes	1	A, C,E,F,G,J,K,L	0	8
12	PRE	Partcipant 12	Male	52	Pader	Secondary	10	Yes		Fungi	1	Trauma to skin	1	Pain	0	Deformity of affected part, Loss of function of affected part	2	Foot, Leg and knee	0	I don’t know	0	Yes	Female	54	Foot	Referred him to health facility	yes	1	A, G	2	7
13	PRE	Partcipant 13	Male	56	Pader	Secondary	17	Yes		Bacteria, Fungi	2	I don’t know	0	Pain	0	Deformity of affected part, Loss of function of affected part	2	Foot, hand, leg and knee, Thigh and buttock	0	Pyomyositis, Chronic osteomyelitis	2	Yes	Male	65	Foot	Referred him to health facility	Yes	1	A,C,G,L	3	10
14	PRE	Partcipant 14	Male	29	Pader	Secondary	3	No	_	Bacteria, Fungi	2	Trauma to skin, Contact with an infected person	0	Discharge with grains, Pain	1	Loss of function, Death	1	Foot, Hand,Leg and knee	0	Foreign body granuloma	1	Yes	Male	53	Foot, Leg and knee	Nothing	Yes	1	A, E, G,J,K,L	2	8
15	PRE	Partcipant 15	Female	43	Pader	Secondary	15	Yes	No	Bacteria	1	Inhalation of aerosols	0	Discharge with grains	1	Loss of fucntion of affected part, Death	1	Foot, Leg and Knee	0	Cancer	1	No					yes	1	G	1	6
16	PRE	Partcipant 16	Male	35	Pader	Secondary	14	No	_	Bacteria, Fungi, Witchcraft	2	Contact with an infected person	0	Painless swelling, Multiple sinuess, Pain	2	Deformity of affected part, Loss of fucntion, Death	1	Foot, Leg and Knee	0	Foreign body granuloma, Cancer	2	Yes	Male	62	Leg and Knee	Nothing	Yes	1	A, B, C, F, G, H, J,K,L	0	8
17	PRE	Partcipant 17	Male	26	Pader	Certificate	10	Yes	No	Bacteria, Fungi	2	Contact with an infected person	0	Painless swelling, Multiple sinuess, Discharge with grains, Pain	3	Deformity of affected part, Loss of fucntion of affected part, Death	2	Foot, Leg and knee, Thigh and buttock	0	Foreign body granuloma, Cancer, Chronic osteomyelitis	3	Yes	Male	45	Foot, Hand,Leg and knee, Head and neck, Thigh and buttock	Referred him to health facility, Advised patient to apply herbs	No	0	A, D, G, J, K, L	2	12
18	PRE	Partcipant 18	Male	40	Pader	Secondary	10	No	_	Bacteria	1	Contact with an infected person	0	Painless swelling	1	Loss of fucntion of affected part	1	Leg and knee	0	I don’t know	0	Yes	Male	30	Foot	Referred him to health facility	Yes	1	L	0	4
19	PRE	Partcipant 19	Male	25	Pader	Secondary	4	No		Fungi	1	Trauma to skin	1	Painless swelling, Multiple sinuses, Discharge with grains, Pain	3	Deformity of affected part, Loss of function of affected part	2	Foot, Hand, Leg and knee	0	Cancer, Chronic osteomyelitis	2	Yes	Male	56	Foot	Referred to health facility	No	0	A, G	2	11
20	PRE	Partcipant 20	Female	36	Pader	Secondary	16	Yes	No	Bacteria	1	Trauma to skin, Contact with an infected person	0	Painless swelling, Multiple sinuses, Pain	2	Deformity of affected part, Loss of function of affected part	2	Foot, Leg and knee, Head and neck	0	Foreign body granuloma, Cancer	2	Yes	Male	67	Leg and knee	Advised patient to apply herbs	Yes	1	A, C	2	10
21	PRE	Partcipant 21	Male	45	Pader	Secondary	19	Yes	No	Bacteria	1	Trauma to skin	1	Painless swelling, Discharge with grains	2	Deformity of affected part, Loss of fucntion of affected part	2	Foot, Hand,Leg and Knee, Head and neck	0	Foreign body granuloma, Buruli ulcer	2	Yes	Male	52	Foot, Leg and knee	Referred to health facility	No	0	K, L	0	8
22	PRE	Partcipant 22	Male	52	Pader	Secondary	17	No		Bacteria, Fungi	2	Inhalation of aerosols	0	Multiple sinuses, Discharge with grains	2	Deformity of affected part, Loss of function of affected part	2	Leg and knee	0	Foreign body granuloma	1	Yes	Male	58	Foot, Leg and knee	Referred to health facility	Yes	1	A, B, C, G, H, I, J, K,L	0	8
23	POST	Partcipant 1	Female	27	Pader	Certificate	7	Yes	Yes	Fungi	1	Trauma to skin	1	Painless swelling, Multiple sinuses, Discharge with grains	3	Deformity of affected part, Loss of fucntion of affected part	2	Foot	1	Cancer, foreign body granuloma, buruli ulcer	3	No					yes	1	A, G	2	14
24	POST	Partcipant 21	Male	45	Pader	Secondary	19	Yes	Yes	Fungi	1	Trauma to skin	1	Painless swelling, Multiple sinuses, Discharge with grains, Pain	3	Deformity of affected part, Loss of function of affected part	2	Foot	1	Foreign body granuloma, buruli ulcer, cancer, chronic osteomyelitis	4	Yes	Male	15	Foot	Referred to health facility	Yes	1	L	0	13
25	POST	Partcipant 11	Male	30	Pader	Certificate	7	Yes	Yes	Fungi	1	Trauma to skin, Contact with an infected person	1	Painless swelling, Multiple sinuses, Discharge with grains, Pain	3	Deformity of affected part, Loss of function of affected part, Death	2	Foot	1	Foreign body granuloma, Cancer, Chronic osteomyelitis, Buruli ulcer,Pyomyositis	5	No					yes	1	A, G	2	16
26	POST	Partcipant 11	Male	44	Pader	Secondary	18	Yes	Yes	Bacteria, Fungi, Both	2	Trauma to skin	1	Painless swelling, Multiple sinuses, Discharge with grains	3	Deformity of affected part, Loss of function of affected part	2	Foot	1	Foreign body granuloma, Cancer, Pyomyositis		No					Yes	1	A, B, C, E, G, H, I, K, L	0	10
27	POST	Partcipant 6	Male	56	Pader	Secondary	17	Yes	Yes	Both Fungi and bacteria	2	Trauma to skin	1	Painless swelling, Multiple sinuses, Discharge with grains	3	Deformity of affected part, Loss of function of affected part, Death	2	Foot	1	Foreign body granuloma, Cancer	2	No					Yes	1	A, G, J, K	2	14
28	POST	Partcipant 14	Male	29	Pader	Secondary	3	Yes	Yes	Bacteria, Fungi	2	Trauma to skin, Contact with an infected person	1	Painless swelling, Multiple sinuses, Discharge with grains	3	Deformity of affected part, Loss of function of affected part, Death	2	Foot, Hand, Leg and knee, Head and neck	0	Foreign body granuloma, Chronic osteomyelitis	2	No					Yes	1	A, G	2	13
29	POST	Partcipant 13	Male	56	Pader	Secondary	17	Yes	Yes	Bacteria, Fungi, Both	2	Trauma to skin	1	Painless swelling, Multiple sinuses, Discharge with grains	3	Loss of function of affected part, Death	1	Foot	1	Foreign body granuloma	1	No					Yes	1	A, G	2	12
30	POST	Partcipant 15	Male	52	Pader	Secondary	10	Yes	Yes	Bacteria, Fungi, Both Fungi and bacteria	2	Trauma to skin	1	Painless swelling, Multiple sinuses, Discharge with grains	3	Deformity of affected part, Loss of fucntion of affected part	2	Foot	1	Foreign body granuloma, Pyomyositis	2	No					Yes	1	A, G	2	14
31	POST	Partcipant 7	Male	40	Pader	Secondary	17	Yes	Yes	Bacteria, Fungi	2	Trauma to skin	1	Painless swelling, Multiple sinuses, Discharge with grains	3	Deformity of affected part, Loss of fucntion of affected part	2	Foot	1	Foreign body granuloma, Pyomyositis	2	No					Yes	1	A, G	2	14
32	POST	Partcipant 22	Male	52	Pader	Secondary	17	Yes	Yes	Bacteria, Fungi	2	Trauma to skin	1	Multiple sinuses, Discharge with grains, Pain	2	Deformity of affected part, Loss of fucntion of affected part	2	Foot	1	Foreign body granuloma, Pyomyositis, Chronic osteomyelitis	3	No					yes	1	A, G	2	14
33	POST	Partcipant 3	Male	40	Pader	Secondary	13	Yes	Yes	Both Fungi and bacteria	2	Trauma to skin	1	Painless swelling, Multiple sinuses, Discharge with grains	3	Deformity of affected part, Loss of fucntion of affected part, Death	2	Foot	1	Foreign body granuloma, Cancer, buruli ulcer	3	No					No	0	A, G	2	14
34	POST	Partcipant 16	Male	43	Pader	Secondary	17	Yes	Yes	Bacteria, Fungi	2	Trauma to skin	1	Multiple sinuses, Discharge with grains, Pain	2	Deformity of affected part, Loss of fucntion of affected part	2	Foot, hand, Leg and knee	0	Foreign body granuloma, Cancer	3	No					No	0	A, G	2	12
35	POST	Partcipant 5	Male	35	Pader	Secondary	17	Yes	Yes	Bacteria, Witchcraft	1	Trauma to skin	1	Painless swelling, Multiple sinuses, Discharge with grains	3	Deformity of affected part, Loss of fucntion of affected part, Death	2	Foot	1	Foreign body granuloma	1	No					Yes	1	A, G	2	12
36	POST	Partcipant 4	Female	42	Pader	Certificate	3	Yes	Yes	Fungi	1	Trauma to skin		Painless swelling, Multiple sinuses, Discharge with grains	3	Deformity of affected part, Loss of fucntion of affected part, Death	2	Foot, Leg and knee	0	Foreign body granuloma	1	No					Yes	1	A, G	2	10
37	POST	Partcipant 7	Male	40	Pader	Secondary	10	Yes	Yes	Fungi	1	Trauma to skin		Painless swelling	1	Deformity of affected part, Loss of fucntion of affected part	2	Leg and knee	0	Foreign body granuloma	1	No					Yes	1	A	1	7
38	POST	Partcipant 16	Male	35	Pader	Secondary	14	Yes	Yes	Bacteria, Fungi	1	Trauma to skin	1	Painless swelling, Multiple sinuses, Discharge with grains	3	Deformity of affected part, Loss of fucntion of affected part	2	Foot	1	Foreign body granuloma, cancer, buruli ulcer	3	No					yes	1	A, C, G,J,K	3	15
39	POST	Partcipant 10	Male	49	Pader	Secondary	22	Yes	Yes	Fungi	1	Trauma to skin	1	Painless swelling, Multiple sinuses, Discharge with grains	3	Deformity of affected part, Loss of fucntion of affected part, Death	2	Foot, hand, Leg and knee	0	Foreign body granuloma, Buruli ulcer	2	No					yes	1	A, G	2	12
40	POST	Partcipant 2	Male	26	Pader	Certificate	7	Yes	Yes	Both Fungi and bacteria	2	Trauma to skin	1	Painless swelling, Multiple sinuses, Discharge with grains	3	Deformity of affected part, Loss of fucntion of affected part, Death	2	Foot	1	Cancer, Buruli ulcer, Pyomyositis	3	No					yes	1	A, G	2	15
41	POST	Partcipant 20	Female	36	Pader	Secondary	16	Yes	Yes	Bacteria, Fungi	2	Trauma to skin	1	Painless swelling, Multiple sinuses, Discharge with grains	3	Deformity of affected part, Loss of fucntion of affected part, Death	2	Foot	1	Foreign body granuloma, Buruli ulcer	2	No					yes	1	A, G	2	14
42	POST	Partcipant 15	Female	43	Pader	Secondary	15	Yes	Yes	Bacteria	1	Trauma to skin	1	Painless swelling, Multiple sinuses, Discharge with grains	3	Deformity of affected part, Loss of fucntion of affected part, Death	2	Foot	1	Foreign body granuloma, Cancer	2	No					yes	1	A, G	2	13
43	POST	Partcipant 19	Male	25	Pader	Secondary	4	Yes	Yes	Bacteria, Fungi	2	Trauma to skin	1	Painless swelling, Multiple sinuses, Discharge with grains	3	Deformity of affected part, Loss of fucntion of affected part	2	Foot	1	Foreign body granuloma, Cancer	2	No					Yes	1	A, G	2	14
44	POST	Partcipant 17	Male	26	Pader	Certificate	10	Yes	Yes	Bacteria, Fungi	2	Trauma to skin, Contact with an infected person	0	Painless swelling, Multiple sinuses, Discharge with grains	3	Deformity of affected part, Loss of fucntion of affected part	2	Foot	1	Foreign body granuloma	1	No					yes	1	A, G	2	12
45	PRE	Partcipant 23	Female	27	Gulu	Secondary	3	Yes	No	Fungi	1	Contact with an infected person	0	Painless swelling	1	Loss of function of affected part	1	Foot	1	Cancer	1	No					yes	1	G,J,K	1	7
46	PRE	Partcipant 24	Male	25	Gulu	Secondary	1	No	No	Bacteria	1	Contact with an infected person	0	Multiple sinuses	1	Death	0	Foot	1	Pyomyositis	1	No					yes	1	A,B,G,K,L	2	7
47	PRE	Partcipant 25	Male	39	Gulu	Secondary	2	No	No	Bacteria	1	I don’t know	0	Painless swelling	1	Deformity of affected person	1	Trunk(chest)	0		0	No					yes	1	G,J,L	1	5
48	PRE	Partcipant 26	Female	25	Gulu	Secondary	7	No	No	Bacteria	1	Trauma to skin	1	Painless swelling, Multiple sinuses, Discharge with grains	3	Deformity of affected part, Loss of fucntion of affected part	2	Foot	1	I don’t know	0	No					yes	1	A,B,C,E,G,H,J,K	0	9
49	PRE	Partcipant 27	Female	23	Gulu	Secondary	1	No	I don’t know	Both Fungi and bacteria	2	Contact with an infected person	0	Multiple sinuses	1	Loss of function of affected part	1	Foot	1	Cancer	1	No					yes	1	A,G,K	2	9
50	PRE	Partcipant 28	Male	50	Gulu	Secondary	6	No	No	Fungi	1	I don’t know	0	Painless swelling	1	Loss of function of affected part	1	Foot	1	Pyomyositis	1	No					yes	1	A,G,K	2	8
51	PRE	Partcipant 29	Female	29	Gulu	Other	4	No	No	Bacteria	1	Contact with an infected person	0	Multiple sinuses	1	Loss of function of affected part	1	Foot	1	Cancer	1	No					yes	1	G	1	7
52	PRE	Partcipant 30	Male	33	Gulu	Secondary	1	No	No	Both Fungi and bacteria	2	Trauma to skin	1	Painless swelling	1	Loss of function of affected part	1	Foot	1	Foreign body granuloma	1	No					No	0	G	1	8
53	PRE	Partcipant 31	Male	38	Gulu	Secondary	10	No	No	Bacteria	1	Trauma to skin	1	Painless swelling	1	Deformity of affected person	1	Foot	1	Chronic osteomyelitis	1	No					yes	1	A,C,G,J,L	3	10
54	PRE	Partcipant 32	Male	32	Gulu		8	No	No	I don’t know	0	I don’t know	0	Pain	0	Loss of function of affected part	1	Foot, Hand	0	Cancer	1	No					No	0	A,C,G,K	3	5
55	PRE	Partcipant 33	Male	37	Gulu		7	No	No	Bacteria	1	Contact with an infected person	0	Multiple sinuses	1	Death	0	Foot	1		0						yes	1	A,G	2	6
56	PRE	Partcipant 34	Female	23	Gulu	Secondary	2	No	No	Fungi	1	Trauma to skin	1	Multiple sinuses	1	Deformity of affected person	1	Foot	1	Cancer	1	No					yes	1	B,G	1	8
57	PRE	Partcipant 35	Female	25	Gulu	Secondary	6	No	I don’t know	I don’t know	0	I don’t know	0	Multiple sinuses	1	Deformity of affected person	1	Foot	1	Buruli ulcer	1	Yes	Male	56	Foot	Referred to health facility	yes	1	I don’t know	0	5
58	PRE	Partcipant 36	Male	42	Gulu	Primary	9	No	No	Bacteria	1	I don’t know	0	I don’t know	0	I don’t know	0	Foot	1	I don’t know	0	No					yes	1	A,G	2	5
59	PRE	Partcipant 37	Male	35	Gulu	Certificate	15	No	No	I don’t know	0	I don’t know	0	Painless swelling	1	Loss of function of affected part, Death	1	Foot	1	Chronic osteomyelitis	1	Yes	Male	50	Foot	Referred to health facility	yes	1	B,G	1	6
60	PRE	Partcipant 38	Male	40	Gulu	Secondary	15	No	No	Bacteria	1	Trauma to skin	1	Painless swelling, Discharge with grains	2	Deformity of affected person	1	Leg and knee	0	Cancer	1	No					yes	1	G	1	8
61	PRE	Partcipant 39	Female	35	Gulu	Secondary	5	No	No	Bacteria	1	I don’t know	0	Multiple sinuses	1	Death	0	Foot	1	Cancer	1	No					yes	1	G	1	6
62	PRE	Partcipant 40	Female	35	Gulu	Primary	1	Yes	Yes	I don’t know	0	I don’t know	0	Multiple sinuses	1	Death	0	Foot	1	Chronic osteomyelitis	1	Yes	Male		I don’t know		yes	1	G	1	5
63	PRE	Partcipant 41	Male	60	Gulu	Primary	1	No	No	Bacteria	1	I don’t know	0	Painless swelling	1	Loss of function of affected part	1	Foot	1	Pyomyositis	1	No					yes	1	A,G,J,L	2	8
64	PRE	Partcipant 42	Male	30	Gulu	Secondary	1	No	No	Bacteria	1	I don’t know	0	Painless swelling	1	Loss of function of affected part	1	Foot	1	Pyomyositis	1	No					yes	1	G,K	1	7
65	PRE	Partcipant 43	Male	30	Gulu	Secondary	1	No	No	Bacteria	1	Trauma to skin	1	Multiple sinuses	1	Loss of function of affected part	1	Foot	1	Pyomyositis	1	No					yes	1	G	1	8
66	PRE	Partcipant 44	Male	47	Gulu	Secondary	1	No		Bacteria	1	Trauma to skin	1	Painless swelling	1	Death	0	Leg and knee	0	Foreign body granuloma	1	No					yes	1	G,L	1	6
67	PRE	Partcipant 45	Male	50	Gulu			No		I don’t know	0	I don’t know	0	Multiple sinuses	1	Loss of function of affected part	1	Foot	1	Cancer	1	No					yes	1	G,L	1	6
68	POST	Partcipant 25	Male	39	Gulu	Secondary	2	Yes	Yes	Fungi	1	Trauma to skin	1	Painless swelling	1	Deformity of affected person	1	Foot	1	Foreign body granuloma, cancer, pyomyositis	3	No			Foot			0	A,G,J	2	10
69	POST	Partcipant 32	Male	32	Gulu		8	Yes	Yes	Bacteria	1	Trauma to skin	1	Painless swelling, multicple sinuses	2	Deformity of affected part	1	Foot	1	Buruli ulcer, cancer, chronic osteomyelitis, pyomyositis	4							0	G,D,K,C,E,J,F,M	0	10
70	POST	Partcipant 44	Male	47	Gulu	Secondary	1	No	I don’t know	Bacteria	1	Trauma to skin	1	Painless swelling	1	Deformity of affected person	1	Foot	1	Foreign body granuloma, cancer, buruli ulcer,	3	No			Foot	Referred to health facility	No	0	A,G,K	2	10
71	POST	Partcipant 45	Male	50	Gulu		2	Yes	Yes	Both Fungi and bacteria	2	Trauma to skin	1	Painless swelling, Multiple sinuses, Discharge with grains	3	Deformity of affected part, Loss of fucntion of affected part	2	Foot	1	Foreign body granuloma	1	No						0	A,G	2	12
72	POST	Partcipant 24	Male	25	Gulu	Secondary	1	No	No	Bacteria	1	Trauma to skin	1	Painless swelling, Multiple sinuses	2	Deformity of affected part, Death	2	Foot	1	Foreign body granuloma, cancer	2	No					yes	1	A,G	2	12
73	POST	Partcipant 38	Female	40	Gulu	Secondary	15	Yes	Yes	Both Fungi and bacteria	2	Trauma to skin	1	Painless swelling	1	Deformity of affected person	1	Foot	1	Foreign body granuloma	1	No						0	A,G	2	9
74	POST	Partcipant 42	Male	30	Gulu	Secondary	1	No	No	Bacteria	1	Trauma to skin	1	Painless swelling, multiple sinuses	2	Loss of function of affected part, deformity of affected part	2	Foot	1	Foreign body granuloma, pyomyositis, cancer	3	No						0	I don’t know	0	10
75	POST	Partcipant 39	Female	35	Gulu	Secondary	5	Yes	Yes	Both Fungi and bacteria	2	Trauma to skin	1	Painless swelling	1	Death	0	Foot	1	Foreign body granuloma	1	No					yes	1	A,G	2	9
76	POST	Partcipant 26	Female	25	Gulu	Secondary	7	Yes	Yes	Both Fungi and bacteria	2	Trauma to skin	1	Painless swelling	1	Loss of function of affected part	1	Foot	1	Foreign body granuloma,Chronic osteomyelitis	2	No						0	A,E,G,I,J,K	2	10
77	POST	Partcipant 27	Female	23	Gulu	Secondary		Yes	Yes	Fungi	1	Trauma to skin	1	Painless swelling	1	Deformity of affected part, Loss of fucntion of affected part	2	Foot	1	Cancer, Buruli ulcer	2							0	A,G	2	10
78	POST	Partcipant 37	Male	35	Gulu	Certificate	15	Yes	Yes	Both Fungi and bacteria	2	Trauma to skin	1	Painless swelling	1	Death	0	Foot	1	Chronic osteomyelitis, buruli ulcer	2	Yes	Male	50	Foot	Referred him/her to hospital	yes	1	A,G	2	10
79	POST	Partcipant 40	Female	35	Gulu	Primary	1	Yes	Yes	Both Fungi and bacteria	2	Trauma to skin	1	Painless swelling	1	Deformity of affected part, Loss of fucntion of affected part	2	Foot	1	Foreign body granuloma, cancer, buruli ulcer	3	Yes	Male	69	Foot	Referred to health facility	yes	1	A,G	2	13
80	POST	Partcipant 33	Male	37	Gulu	Secondary	7	No	Yes	Both Fungi and bacteria	2	Trauma to skin	1	Painless swelling, discharge with grains	2	Deformity of affected part, Death	1	Foot	1	Foreign body granuloma, cancer, chronic osteomyositis	3							0	A,G	2	12
81	POST	Partcipant 34	Female	23	Gulu	Secondary	2	Yes	Yes	Fungi, bacteria	2	Trauma to skin	1	Painless swelling	1	Deformity of affected person, Loss of function of affected part	2	Foot	1	Foreign body granuloma, pyomyositis	2	No					yes	1	A,G,J,K	2	12
82	POST	Partcipant 43	Male	30	Gulu	Secondary	1	No	Yes	Bacteria	1	Trauma to skin	1	Painless swelling	1	Loss of function of affected part	1	Foot	1	Foreign body granuloma, cancer, buruli ulcer	3	No					yes	1	G	1	10
83	POST	Partcipant 30	Male	33	Gulu	Secondary	1	Yes	Yes	Both Fungi and bacteria	2	Trauma to skin	1	Discharge with grains	1	Deformity of affected person	1	Foot	1	Foreign body granuloma	1	No						0	A,G	2	9
84	POST	Partcipant 31	Male	38	Gulu	Secondary	10	Yes	Yes	Bacteria	1	Trauma to skin	1	Painless swelling	1	Deformity of affected person	1	Foot	1	Foreign body granuloma	1	Yes	Male	40	Foot	Referred to health facility	yes	1	A,G	2	9
85	POST	Partcipant 29	Female	29	Gulu		4	No	No	Bacteria	1	Trauma to skin	1	Multiple sinuses	1	Deformity of affected person	1	Foot	1	Cancer, foreign body granuloma, buruli ulcer	3	No					yes	1	A,G,J,L	2	11
86	POST	Partcipant 23	Female	27	Gulu	Secondary	3	Yes	Yes	Both Fungi and bacteria	2	Trauma to skin	1	Discharge with grains, painless swelling	2	Deformity of affected person	1	Foot	1	Foreign body granuloma, cancer	2	Yes	Female	20	Foot	Referred to health facility	yes	1	G	1	11
87	POST	Partcipant 41	Male	60	Gulu	Primary	2	Yes	Yes	Both Fungi and bacteria	2	Trauma to skin	1	Multiple sinuses, painless swelling	2	Deformity of affected person	1	Foot	1	Foreign body granuloma	1	No					yes	1	A	1	10
88	POST	Partcipant 28	Male	50	Gulu	Secondary	6	No	No	Fungi	1	Trauma to skin	1	Painless swelling, multiple sinuses, discharge with grains	3	Deformity of affected person	1	Foot	1	Foreign body granuloma	1	No					yes	1	A,G,K	2	11
89	POST	Partcipant 35	Female	25	Gulu	Secondary	6	Yes	Yes	Both Fungi and bacteria	2	Trauma to skin	1	Painless swelling, multiple sinuses, discharge with grains	3	Loss of function of affected part	1	Foot	1	Buruli ulcer	1	Yes	Male	65	Foot	Referred to health facility	yes	1	A	1	11
90	POST	Partcipant 36	Male	42	Gulu	Certificate	9	No	I don’t know	Fungi	1	Sexually trasmitted	0	Multiple sinuses, painless swelling	2	Loss of function of affected part, Deformity	2	Foot	1	Foreign body granuloma, cancer, buruli ulcer	3	No			Foot	Advised patient to apply herbs		0	A,G	2	11
91	6 months	Partcipant 16	Male	35	Pader	Secondary	16	Yes	Yes	Bacteria, Fungi	2	_	0	Multiple sinuses,Discharge with grains	2	Deformity of affected part, loss of function of affected part	2	Foot	1	Foreign body granuloma, cancer, buruli ulcers	4	Yes	Male	51	Foot, Leg and Knee	Referred to health facility	No	0	A, G, K, C, L, J, B, F, E, D	0	11
92	6 months	Partcipant 21	Male	45	Pader	Primary	18	Yes	Yes	Bacteria	1	Trauma/Physical injury on skin	1	Discharge with grains	1	loss of function of affected part	1	Head and neck	0	Foreign body granuloma, Chronic osteomyelitis	3	Yes	Female	15	Foot		Yes	1	A, C, G, K	3	11
93	6 months	Partcipant 2	Male	26	Pader	Certificate	6	Yes	Yes	Bacteria	1	Trauma/Physical injury on skin	1	Painless swelling, Multiple sinuses, Discharge with grains	3	Deformity of affected part, loss of function of affected part, Death	2	Foot	1	Foreign body granuloma, cancer	3	No					Yes	1	A, G, J, K, L	2	14
94	6 months	Partcipant 15	Female	44	Pader	Secondary	15	Yes	Yes	Bacteria, Fungi	2	Contact with an infected person	0	Painless swelling, Multiple sinuses, Discharge with grains, Pain	3	Deformity of affected part, loss of function of affected part, Death	2	Foot	1	Buruli ulcer, Pyomyositis	2	Yes	Female	76	Foot	Referred to health facility, referred him/her to hospital	No	0	A, G	2	12
95	6 months	Partcipant 17	Male	26	Pader	Secondary	15	Yes	Yes	Bacteria, Fungi	2	Trauma/Physical injury on skin, Contact with an infected person	1	Painless swelling, Discharge with grains, Pain	2	Deformity of affected part, loss of function of affected part, Death	2	Foot	1	Foreign body granuloma, buruli ulcers, Chronic osteomyelitis	4	Yes	Male	59	Foot	Referred to health facility	Yes	1	A, G, K	2	15
96	6 months	Partcipant 20	Female	37	Pader	Secondary	16	Yes	Yes	Bacteria	1	Trauma/Physical injury on skin	1	Painless swelling, Discharge with grains	2	Deformity of affected part, loss of function of affected part	2	Foot, Leg and knee	0	Foreign body granuloma, Chronic osteomyelitis	3	No					Yes	1	A, B, C, G, J, K, L	0	10
97	6 months	Partcipant 22	Male	52	Pader	Secondary	18	Yes	Yes	Bacteria	1	Inhalation of aerosols	0	Discharge with grains	1	Deformity of affected part	1	Leg and Knee	0	Foreign body granuloma, Chronic osteomyelitis	3	No					Yes	1	A, G	2	9
98	6 months	Partcipant 12	Male	53	Pader		14	Yes	Yes	Bacteria	1	Trauma/Physical injury on skin	1	Multiple sinuses,Discharge with grains	2	Death	0	Foot	1	Foreign body granuloma	2	Yes	Female	56	Foot	Referred to health facility	Yes	1	A, G, K	2	10
99	6 months	Partcipant 13	Male	54	Pader	Secondary	17	Yes	Yes	Fungi	1	Contact with an infected person	0	Discharge with grains	1	Deformity of affected part	1	Foot	1	Foreign body granuloma	2	Yes	Female	45	Foot	Referred to health facility	I don’t know	0	A, G	2	8
100	6 months	Partcipant 14	Male	30	Pader	Secondary	3	Yes	Yes	Fungi	1	Contact with an infected person	0	Discharge with grains	1	loss of function of affected part	1	Leg and Knee	0	Pyomyositis	1	Yes	Male	27	Foot	Advised patient to apply herbs	Yes	1	A, C, G, K	3	8
101	6 months	Partcipant 8	Male	31	Pader	Certificate	8	Yes	Yes	Fungi, Witchcraft	0	Contact with an infected person	0	Painless swelling, Discharge with grains	2	Deformity of affected part	1	Foot	1	Foreign body granuloma	2	No					Yes	1	A, B, C, G, J, K,	0	7
102	6 months	Partcipant 4	Female	43	Pader	Other	5	Yes	Yes	Bacteria, Fungi	1	Trauma/Physical injury on skin	1	Discharge with grains	1	loss of function of affected part, Death	1	Foot	1	Foreign body granuloma, Cancer, Pyomyositis	4	No					Yes	1	A, G, I	2	12
103	6 months	Partcipant 6	Female	54	Pader	Secondary	17	Yes	Yes	Bacteria	1	Trauma/Physical injury on skin	1	Painless swelling, Discharge with grains	2	Deformity of affected part, loss of function of affected part, Death	2	Foot, Hand, Leg and knee	0	Foreign body granuloma, Cancer, Pyomyositis, Chronic osteomyelitis	5	No					Yes	1	A, B, E , G, J, K	0	12
104	6 months	Partcipant 7	Male	40	Pader	Secondary	18	Yes	Yes	Fungi	1	Inhalation of aerosols	0	Multiple sinuses, Pain	1	loss of function of affected part	1	Foot, Hand, Leg and knee	0	Cancer	1	Yes	Male	62	Foot	Referred to health facility	Yes	1	A, G, K	2	7
105	6 months	Partcipant 42	Male	30	Gulu	Other	10	Yes	Yes	Bacteria	1	Trauma/Physical injury on skin	1	Discharge with grains	1	loss of function of affected part	1	Foot	1	Foreign body granuloma	2	No					Yes	1	A, C, D, G	3	11
106	6 months	Partcipant 39	Female	35	Gulu	Secondary	6	Yes	Yes	Bacteria	1	Trauma/Physical injury on skin	1	Painless swelling, Multiple sinuses, Discharge with grains	3	Deformity of affected part, loss of function of affected part, Death	2	Foot	1	Foreign body granuloma, buruli ulcers, Pyomyositis	4	Yes	Male	50	Foot	Referred to health facility	Yes	1	A, B, C, D, E, G, I, J, K, L	0	13
107	6 months	Partcipant 31	Male	39	Gulu	Secondary	11	Yes	Yes	Fungi	1	Trauma/Physical injury on skin	1	Painless swelling	1	Deformity of affected part	1	Foot	1	Buruli ulcer	1	No					Yes	1	A, G, K	2	9
108	6 months	Partcipant 28	Male	48	Gulu	Secondary	10	Yes	Yes	Bacteria	1	Trauma/Physical injury on skin, Contact with an infected person	1	Painless swelling	1	Deformity of affected part	1	Foot	1	Chronic ostemyelitis	1	Yes	Male	36	Foot	Referred to health facility	Yes	1	A, G, H,I, K	2	9
109	6 months	Partcipant 26	Female	25	Gulu	Secondary	8	Yes	Yes	Bacteria	1	Trauma/Physical injury on skin	1	Painless swelling, Discharge with grains	2	Deformity of affected part, loss of function of affected part	2	Foot, Leg and knee	0	Foreign body granuloma, Chronic osteomyelitis	3	No					Yes	1	A, B, C, E G	3	13
110	6 months	Partcipant 37	Male	36	Gulu	Secondary	10	Yes	Yes	Bacteria, Fungi	2	Trauma/Physical injury on skin	1	Painless swelling	1	Deformity of affected part, loss of function of affected part, Death	2	Foot	1	Foreign body granuloma, Cancer, Pyomyositis	4	Yes	Male	51	Foot	Referred him/her to health facility	Yes	1	A, G	2	14
111	6 months	Partcipant 32	Male	32	Gulu	Secondary	1	Yes	Yes	Bacteria	1	Trauma/Physical injury on skin	1	Painless swelling	1	Deformity of affected part	1	Foot	1	Foreign body granuloma	2	Yes	Female	65	Foot	Referred to health facility	Yes	1	A, C, E, G, J, K, L	0	8
112	6 months	Partcipant 45	Male	50	Gulu	Other	3	Yes	Yes	Bacteria	1	Trauma/Physical injury on skin	1	Discharge with grains	1	Deformity of affected part	1	Foot	1	Foreign body granuloma	2	No					Yes	1	A, C, G	3	11
113	6 months	Partcipant 40	Female	31	Gulu	Secondary	1	Yes	Yes	Fungi	1	Trauma/Physical injury on skin	1	Discharge with grains	1	Deformity of affected part	1	Foot	1	Foreign body granuloma	2	No					_	0	G	1	8
114	6 months	Partcipant 24	Male	25	Gulu	Secondary	1	Yes	Yes	_	0	Trauma/Physical injury on skin	1	Painless swelling	1	Deformity of affected part	1	Foot	1	Cancer	1	No					Yes	1	A, G, H, K	2	8
115	6 months	Partcipant 25	Male	43	Gulu	Secondary	3	Yes	Yes	Bacteria	1	Trauma/Physical injury on skin	1	Painless swelling	1	loss of function of affected part	1	Foot	1	Foreign body granuloma	2	Yes	Female	55	Foot	Referred to health facility	Yes	1	A, B, C, G, H, I, J, K, L	0	8
116	6 months	Partcipant 36	Male	45	Gulu	Secondary	9	Yes	Yes	Witchcraft	0	Trauma/Physical injury on skin	1	Discharge with grains	1	Deformity of affected part	1	Foot	1	Foreign body granuloma	2	Yes	Male	36	Foot	Referred to health facility	Yes	1	A, C, F, G, H, I, J, K, L	0	7
117	6 months	Partcipant 29	Female	30	Gulu	Other	4	Yes	Yes	Fungi	1	Trauma/Physical injury on skin	1	Discharge with grains	1	loss of function of affected part	1	Foot	1	Foreign body granuloma	2	No					Yes	1	A, G, J	2	10
